# Supplementary material for: Sensory Characterization and Acceptability of a New Lulo (Solanum quitoense Lam.) Powder-Based Soluble Beverage Using Rapid Evaluation Techniques with Consumers
Source: MDPI journal article supplement (doi:10.3390/foods11193129), 2022-10-08
Supplement: s1 [file s1]

**Table S1.** Frequency (%) with the visual terms related of the CATA questions used by consumers to describe the eight beverage samples and their ideal product.

| Atributtes      | Ideal | JMS  | JIS  | JMX  | JIX  | PMS  | PIS  | PMX  | PIX  |
|-----------------|-------|------|------|------|------|------|------|------|------|
| V-Homogeneous   | 72.5  | 29.0 | 39.1 | 36.2 | 27.5 | 39.1 | 30.4 | 33.3 | 26.1 |
| V-V.Color       | 56.5  | 5.8  | 7.2  | 15.9 | 8.7  | 23.2 | 33.3 | 30.4 | 23.2 |
| V-Clean         | 53.6  | 15.9 | 1.4  | 17.4 | 13.0 | 18.8 | 8.7  | 15.9 | 13.0 |
| V-Bright        | 44.9  | 10.1 | 0.0  | 14.5 | 11.6 | 13.0 | 13.0 | 11.6 | 17.4 |
| V-Yellow        | 43.5  | 21.7 | 11.6 | 24.6 | 23.2 | 63.8 | 63.8 | 66.7 | 68.1 |
| V-Green         | 13.0  | 65.2 | 68.1 | 73.9 | 63.8 | 2.9  | 2.9  | 1.4  | 1.4  |
| V-Opaque        | 7.2   | 26.1 | 50.7 | 23.2 | 26.1 | 23.2 | 39.1 | 31.9 | 27.5 |
| V-Brown         | 7.2   | 20.3 | 23.2 | 20.3 | 21.7 | 11.6 | 10.1 | 10.1 | 7.2  |
| V-Sediments     | 7.2   | 29.0 | 14.5 | 23.2 | 34.8 | 42.0 | 49.3 | 46.4 | 42.0 |
| V-Cloudy        | 4.3   | 37.7 | 63.8 | 37.7 | 40.6 | 29.0 | 27.5 | 30.4 | 31.9 |
| V-N.Color       | 4.3   | 27.5 | 26.1 | 21.7 | 23.2 | 8.7  | 15.9 | 10.1 | 18.8 |
| V-Heterogeneous | 1.4   | 13.0 | 15.9 | 10.1 | 15.9 | 11.6 | 13.0 | 20.3 | 29.0 |

**Table S2.** Frequency (%) with the odor terms related of the CATA questions used by consumers to describe the eight beverage samples and their ideal product.

| Atributtes   | Ideal | JMS  | JIS  | JMX  | JIX  | PMS  | PIS  | PMX  | PIX  |
|--------------|-------|------|------|------|------|------|------|------|------|
| O-T.Fruit    | 63.8  | 33.3 | 34.8 | 43.5 | 40.6 | 36.2 | 36.2 | 46.4 | 36.2 |
| O-Fruity     | 53.6  | 33.3 | 29.0 | 39.1 | 31.9 | 33.3 | 30.4 | 30.4 | 40.6 |
| O-Citrus     | 50.7  | 29.0 | 31.9 | 24.6 | 31.9 | 15.9 | 27.5 | 13.0 | 23.2 |
| O-Aromatic   | 43.5  | 15.9 | 21.7 | 18.8 | 18.8 | 10.1 | 8.7  | 13.0 | 5.8  |
| O-Sweet      | 33.3  | 7.2  | 5.8  | 11.6 | 13.0 | 13.0 | 10.1 | 14.5 | 13.0 |
| O-Ripe       | 26.1  | 10.1 | 14.5 | 7.2  | 11.6 | 14.5 | 23.2 | 17.4 | 13.0 |
| O-Pineapple  | 18.8  | 20.3 | 17.4 | 18.8 | 17.4 | 13.0 | 17.4 | 15.9 | 17.4 |
| O-Orange     | 17.4  | 1.4  | 2.9  | 0.0  | 0.0  | 4.3  | 7.2  | 4.3  | 4.3  |
| O-Floral     | 14.5  | 13.0 | 8.7  | 10.1 | 11.6 | 7.2  | 10.1 | 7.2  | 8.7  |
| O-Kiwi       | 8.7   | 8.7  | 13.0 | 14.5 | 17.4 | 8.7  | 4.3  | 5.8  | 7.2  |
| O-Unripe     | 5.8   | 20.3 | 20.3 | 20.3 | 20.3 | 13.0 | 18.8 | 11.6 | 14.5 |
| O-Lemon      | 5.8   | 5.8  | 5.8  | 5.8  | 2.9  | 1.4  | 0.0  | 1.4  | 5.8  |
| O-N.Aromatic | 4.3   | 20.3 | 29.0 | 24.6 | 18.8 | 34.8 | 39.1 | 36.2 | 49.3 |
| O-Chemical   | 0.0   | 10.1 | 18.8 | 10.1 | 14.5 | 15.9 | 10.1 | 10.1 | 7.2  |
| O-Moldy      | 0.0   | 5.8  | 5.8  | 2.9  | 4.3  | 4.3  | 1.4  | 2.9  | 2.9  |
| O-Medicine   | 0.0   | 13.0 | 11.6 | 5.8  | 13.0 | 18.8 | 14.5 | 10.1 | 7.2  |
| O-Off        | 0.0   | 24.6 | 18.8 | 15.9 | 21.7 | 23.2 | 17.4 | 13.0 | 13.0 |

**Table S3.** Frequency (%) with the flavor terms related of the CATA questions used by consumers to describe the eight beverage samples and their ideal product.

| Atributtes    | Ideal | JMS  | JIS  | JMX  | JIX  | PMS  | PIS  | PMX  | PIX  |
|---------------|-------|------|------|------|------|------|------|------|------|
| F-J.Acidity   | 66.7  | 33.3 | 26.1 | 33.3 | 46.4 | 20.3 | 24.6 | 31.9 | 40.6 |
| F-Fresh       | 56.5  | 17.4 | 8.7  | 15.9 | 23.2 | 7.2  | 10.1 | 14.5 | 18.8 |
| F-J.Sweetness | 53.6  | 11.6 | 14.5 | 26.1 | 27.5 | 15.9 | 15.9 | 23.2 | 26.1 |
| F-Sweet       | 31.9  | 15.9 | 13.0 | 15.9 | 8.7  | 17.4 | 20.3 | 20.3 | 27.5 |
| F-Ripe        | 31.9  | 8.7  | 10.1 | 7.2  | 2.9  | 15.9 | 15.9 | 15.9 | 15.9 |
| F-Pineapple   | 31.9  | 17.4 | 20.3 | 27.5 | 18.8 | 13.0 | 20.3 | 24.6 | 17.4 |
| F-Orange      | 24.6  | 2.9  | 8.7  | 11.6 | 11.6 | 7.2  | 8.7  | 8.7  | 14.5 |
| F-Kiwi        | 15.9  | 8.7  | 14.5 | 15.9 | 17.4 | 4.3  | 4.3  | 13.0 | 11.6 |
| F-N.Sweet     | 14.5  | 30.4 | 18.8 | 17.4 | 21.7 | 23.2 | 18.8 | 15.9 | 14.5 |
| F-Lemon       | 14.5  | 13.0 | 11.6 | 14.5 | 14.5 | 4.3  | 5.8  | 5.8  | 10.1 |
| F-N.Acidic    | 11.6  | 14.5 | 11.6 | 11.6 | 8.7  | 24.6 | 24.6 | 21.7 | 18.8 |
| F-V.Acidic    | 7.2   | 31.9 | 40.6 | 36.2 | 31.9 | 14.5 | 11.6 | 10.1 | 11.6 |
| F-Unripe      | 7.2   | 18.8 | 18.8 | 17.4 | 21.7 | 15.9 | 10.1 | 10.1 | 8.7  |
| F-V.Sweet     | 4.3   | 7.2  | 7.2  | 1.4  | 10.1 | 5.8  | 8.7  | 4.3  | 8.7  |
| F-Rough       | 2.9   | 18.8 | 18.8 | 20.3 | 13.0 | 13.0 | 14.5 | 13.0 | 11.6 |
| F-Bitter      | 1.4   | 23.2 | 17.4 | 7.2  | 10.1 | 15.9 | 15.9 | 13.0 | 14.5 |
| F-Metallic    | 0.0   | 15.9 | 7.2  | 5.8  | 4.3  | 11.6 | 13.0 | 7.2  | 2.9  |
| F-Off         | 0.0   | 23.2 | 26.1 | 13.0 | 14.5 | 24.6 | 27.5 | 11.6 | 14.5 |
| F-Chemical    | 0.0   | 18.8 | 21.7 | 7.2  | 13.0 | 31.9 | 29.0 | 17.4 | 10.1 |
| F-Dryness     | 0.0   | 10.1 | 11.6 | 10.1 | 4.3  | 15.9 | 11.6 | 10.1 | 7.2  |
| F-Liquorous   | 0.0   | 1.4  | 0.0  | 0.0  | 0.0  | 2.9  | 4.3  | 1.4  | 4.3  |

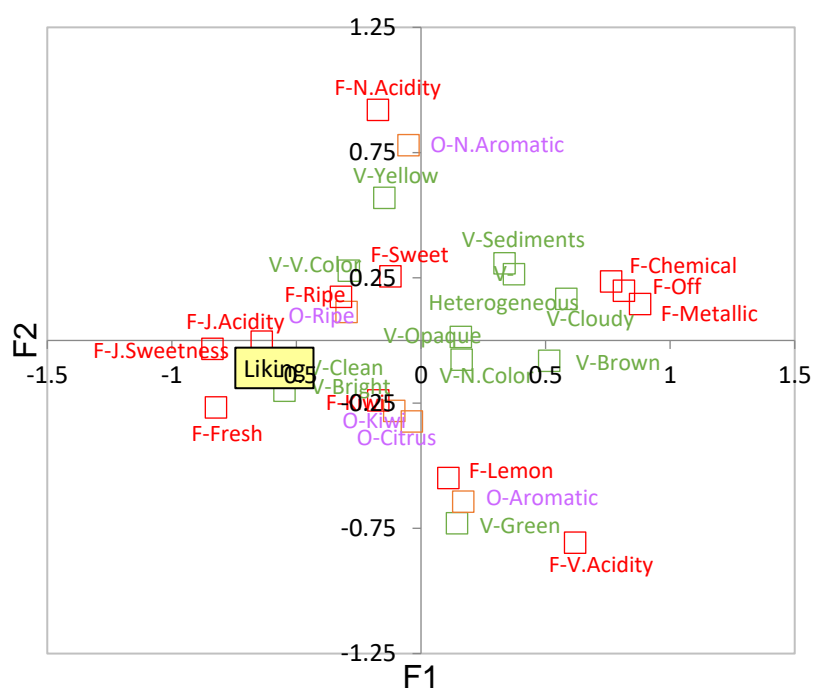

**Figure S1.** Principal component analysis (PCA) applied to the correlation coefficients between attributes and liking scores.

**Table S4.** Penalty analysis for juice only samples (Js). Summary of the frequencies with which presence in the ideal but not in the real product (P(No)|I(Yes)) and presence in the ideal and real product (P(Yes)|I(Yes)) occurs for each attribute, mean drops in liking between the two situations and significances.

| Variable                 | Level        | Frequency % | Mean (Liking) | Effect on the mean | P-Value | Significant | Penalty |
|--------------------------|--------------|-------------|---------------|--------------------|---------|-------------|---------|
| Clean                    | P(No)I(Yes)  | 43.48%      | 5.008         | 1.170              | 0.011   | Yes         | 0.808   |
|                          | P(Yes)I(Yes) | 10.14%      | 6.179         |                    |         |             |         |
| Yellow color             | P(No)I(Yes)  | 34.78%      | 5.302         | 0.073              | 0.985   | No          | -0.085  |
|                          | P(Yes)I(Yes) | 8.70%       | 5.375         |                    |         |             |         |
| Homogeneous appearance   | P(No)I(Yes)  | 46.01%      | 5.118         | 0.731              | 0.028   | Yes         | 0.539   |
|                          | P(Yes)I(Yes) | 26.45%      | 5.849         |                    |         |             |         |
| Heterogeneous appearance | P(No)I(Yes)  | 1.45%       | 5.750         |                    | <0.0001 | No          | 0.000   |
|                          | P(Yes)I(Yes) | 0.00%       |               |                    | <0.0001 | No          | 0.000   |
| Very intense color       | P(No)I(Yes)  | 49.28%      | 5.199         | 0.901              | 0.129   | No          | 0.698   |
|                          | P(Yes)I(Yes) | 7.25%       | 6.100         |                    |         |             |         |
| Bright                   | P(No)I(Yes)  | 39.49%      | 4.633         | 2.567              | <0.0001 | Yes         | 1.848   |
|                          | P(Yes)I(Yes) | 5.43%       | 7.200         |                    |         |             |         |
| Very aromatic            | P(No)I(Yes)  | 30.80%      | 6.012         | -0.383             | 0.580   | No          | 0.201   |
|                          | P(Yes)I(Yes) | 12.68%      | 5.629         |                    |         |             |         |
| Fruity                   | P(No)I(Yes)  | 30.43%      | 4.869         | 1.256              | 0.000   | Yes         | 0.875   |
|                          | P(Yes)I(Yes) | 23.19%      | 6.125         |                    |         |             |         |
| Chemical/artificial      | P(No)I(Yes)  | 0.00%       |               |                    | <0.0001 | No          | 0.000   |
|                          | P(Yes)I(Yes) | 0.00%       |               |                    | <0.0001 | No          | 0.000   |
| Citrus                   | P(No)I(Yes)  | 29.71%      | 4.890         | 0.817              | 0.037   | Yes         | 0.322   |
|                          | P(Yes)I(Yes) | 21.01%      | 5.707         |                    |         |             |         |
| Tropical fruit           | P(No)I(Yes)  | 32.97%      | 5.341         | 0.389              | 0.385   | No          | 0.400   |
|                          | P(Yes)I(Yes) | 30.80%      | 5.729         |                    |         |             |         |
| Moldy/musty              | P(No)I(Yes)  | 0.00%       |               |                    | <0.0001 | No          | 0.000   |
|                          | P(Yes)I(Yes) | 0.00%       |               |                    | <0.0001 | No          | 0.000   |
| Ripe fruit odor          | P(No)I(Yes)  | 20.65%      | 4.912         | 1.754              | 0.005   | Yes         | 1.284   |
|                          | P(Yes)I(Yes) | 5.43%       | 6.667         |                    |         |             |         |
| Sweet odor               | P(No)I(Yes)  | 28.62%      | 4.949         | 1.204              | 0.095   | No          | 0.736   |
|                          | P(Yes)I(Yes) | 4.71%       | 6.154         |                    |         |             |         |
| Medicine                 | P(No)I(Yes)  | 0.00%       |               |                    | <0.0001 | No          | 0.000   |
|                          | P(Yes)I(Yes) | 0.00%       |               |                    | <0.0001 | No          | 0.000   |
| Off-odor                 | P(No)I(Yes)  | 0.00%       |               |                    | <0.0001 | No          | 0.000   |
|                          | P(Yes)I(Yes) | 0.00%       |               |                    | <0.0001 | No          | 0.000   |
| Orange aroma             | P(No)I(Yes)  | 17.39%      | 4.917         |                    | <0.0001 | No          | 0.000   |
|                          | P(Yes)I(Yes) | 0.00%       |               |                    | <0.0001 | No          | 0.000   |
| Sweet flavor             | P(No)I(Yes)  | 24.28%      | 4.522         | 1.192              | 0.032   | Yes         | 0.283   |
|                          | P(Yes)I(Yes) | 7.61%       | 5.714         |                    |         |             |         |
| Not very acidic          | P(No)I(Yes)  | 11.59%      | 4.344         |                    | <0.0001 | No          | 0.000   |
|                          | P(Yes)I(Yes) | 0.00%       |               |                    | <0.0001 | No          | 0.000   |
| Just-right acidity       | P(No)I(Yes)  | 39.13%      | 5.074         | 1.347              | <0.0001 | Yes         |         |

|                      |              |        |       |       |         |     |       |
|----------------------|--------------|--------|-------|-------|---------|-----|-------|
|                      | P(Yes)I(Yes) | 27.54% | 6.421 |       |         |     | 1.336 |
| Just-right sweetness | P(No)I(Yes)  | 40.22% | 5.099 | 2.252 | <0.0001 | Yes |       |
|                      | P(Yes)I(Yes) | 13.41% | 7.351 |       |         |     | 2.192 |
| Metallic             | P(No)I(Yes)  | 0.00%  |       |       | <0.0001 | No  | 0.000 |
|                      | P(Yes)I(Yes) | 0.00%  |       |       | <0.0001 | No  | 0.000 |
| Fresh                | P(No)I(Yes)  | 44.57% | 5.033 | 1.816 | <0.0001 | Yes |       |
|                      | P(Yes)I(Yes) | 11.96% | 6.848 |       |         |     | 1.585 |
| Off-flavor           | P(No)I(Yes)  | 0.00%  |       |       | <0.0001 | No  | 0.000 |
|                      | P(Yes)I(Yes) | 0.00%  |       |       | <0.0001 | No  | 0.000 |
| Ripe fruit flavor    | P(No)I(Yes)  | 30.43% | 5.071 | 2.179 | 0.073   | No  |       |
|                      | P(Yes)I(Yes) | 1.45%  | 7.250 |       |         |     | 1.824 |
| Chemical/artificial  | P(No)I(Yes)  | 0.00%  |       |       | <0.0001 | No  | 0.000 |
|                      | P(Yes)I(Yes) | 0.00%  |       |       | <0.0001 | No  | 0.000 |
| Dryness              | P(No)I(Yes)  | 0.00%  |       |       | <0.0001 | No  | 0.000 |
|                      | P(Yes)I(Yes) | 0.00%  |       |       | <0.0001 | No  | 0.000 |
| Liquorous            | P(No)I(Yes)  | 0.00%  |       |       | <0.0001 | No  | 0.000 |
|                      | P(Yes)I(Yes) | 0.00%  |       |       | <0.0001 | No  | 0.000 |

**Table S5.** Penalty analysis for juice only samples (Js). Summary of the frequencies with which no presence in the ideal nor in the real product (P(No)|I(No)) and no presence in the ideal but yes in the real product (P(Yes)|I(No)) occurs for each attribute, mean drops in liking between the two situations and significances.

| Variable               | Level       | Frequency % | Mean (Liking) | Effects on the mean | P-Value | Significant | Penalty |
|------------------------|-------------|-------------|---------------|---------------------|---------|-------------|---------|
| Cloudy                 | P(No)I(No)  | 54.35%      | 5.847         |                     |         |             | 0.863   |
|                        | P(Yes)I(No) | 41.30%      | 4.921         | -0.926              | 0.000   | Yes         |         |
| Opaque                 | P(No)I(No)  | 64.86%      | 5.559         |                     |         |             | 0.301   |
|                        | P(Yes)I(No) | 27.90%      | 5.091         | -0.468              | 0.075   | No          |         |
| Green color            | P(No)I(No)  | 30.07%      | 5.157         |                     |         |             | -0.424  |
|                        | P(Yes)I(No) | 56.88%      | 5.338         | 0.181               | 0.480   | No          |         |
| Sediments              | P(No)I(No)  | 70.65%      | 5.508         |                     |         |             | 0.187   |
|                        | P(Yes)I(No) | 22.10%      | 5.148         | -0.360              | 0.216   | No          |         |
| Not very intense color | P(No)I(No)  | 72.83%      | 5.498         |                     |         |             | 0.164   |
|                        | P(Yes)I(No) | 22.83%      | 5.222         | -0.275              | 0.320   | No          |         |
| Not very aromatic      | P(No)I(No)  | 73.19%      | 5.530         |                     |         |             | 0.286   |
|                        | P(Yes)I(No) | 22.46%      | 5.371         | -0.159              | 0.580   | No          |         |
| Off-odor               | P(No)I(No)  | 79.71%      | 5.755         |                     |         |             | 0.000   |
|                        | P(Yes)I(No) | 20.29%      | 4.268         | -1.487              | <0.0001 | Yes         |         |
| Very acidic            | P(No)I(No)  | 61.96%      | 5.702         |                     |         |             | 0.654   |
|                        | P(Yes)I(No) | 30.80%      | 4.565         | -1.137              | <0.0001 | Yes         |         |

**Table S6.** Penalty analysis for samples with pulp (Ps). Summary of the frequencies with which presence in the ideal but not in the real product (P(No)|I(Yes)) and presence in the ideal and real product (P(Yes)|I(Yes)) occurs for each attribute, mean drops in liking between the two situations and significances.

| Variable                 | Level        | Frequency % | Mean (Liking) | Effect on the mean | P-Value | Significant | Penalty |
|--------------------------|--------------|-------------|---------------|--------------------|---------|-------------|---------|
| Clean                    | P(No)I(Yes)  | 42.39%      | 5.436         | 0.790              | 0.102   | No          | 0.818   |
|                          | P(Yes)I(Yes) | 11.23%      | 6.226         |                    |         |             |         |
| Green color              | P(No)I(Yes)  | 13.04%      | 5.500         |                    | <0.0001 | No          | 0.000   |
|                          | P(Yes)I(Yes) | 0.00%       |               |                    | <0.0001 | No          | 0.000   |
| Homogeneous appearance   |              | 46.01%      | 5.315         | 0.534              | 0.140   | No          | 0.475   |
|                          | P(Yes)I(Yes) | 26.45%      | 5.849         |                    |         |             |         |
| Heterogeneous appearance |              | 1.45%       | 4.750         |                    | <0.0001 | No          | 0.000   |
|                          | P(Yes)I(Yes) | 0.00%       |               |                    | <0.0001 | No          | 0.000   |
| Very intense color       | P(No)I(Yes)  | 38.04%      | 5.029         | 0.579              | 0.172   | No          | 0.132   |
|                          | P(Yes)I(Yes) | 18.48%      | 5.608         |                    |         |             |         |
| Bright                   | P(No)I(Yes)  | 35.51%      | 5.122         | -0.584             | 0.332   | No          | -1.062  |
|                          | P(Yes)I(Yes) | 9.42%       | 4.538         |                    |         |             |         |
| Very aromatic            | P(No)I(Yes)  | 35.51%      | 5.316         | -0.180             | 0.916   | No          | -0.395  |
|                          | P(Yes)I(Yes) | 7.97%       | 5.136         |                    |         |             |         |
| Fruity                   | P(No)I(Yes)  | 28.99%      | 5.288         | 0.330              | 0.551   | No          | 0.156   |
|                          | P(Yes)I(Yes) | 24.64%      | 5.618         |                    |         |             |         |
| Chemical/artificial odor |              | 0.00%       |               |                    | <0.0001 | No          | 0.000   |
|                          | P(Yes)I(Yes) | 0.00%       |               |                    | <0.0001 | No          | 0.000   |
| Citrus                   | P(No)I(Yes)  | 35.51%      | 4.959         | 1.112              | 0.004   | Yes         | 0.674   |
|                          | P(Yes)I(Yes) | 15.22%      | 6.071         |                    |         |             |         |
| Tropical fruit           | P(No)I(Yes)  | 31.52%      | 4.897         | 1.126              | 0.000   | Yes         | 0.771   |
|                          | P(Yes)I(Yes) | 32.25%      | 6.022         |                    |         |             |         |
| Moldy/musty              | P(No)I(Yes)  | 0.00%       |               |                    | <0.0001 | No          | 0.000   |
|                          | P(Yes)I(Yes) | 0.00%       |               |                    | <0.0001 | No          | 0.000   |
| Sweet odor               | P(No)I(Yes)  | 27.54%      | 5.132         | 1.431              | 0.018   | Yes         | 1.128   |
|                          | P(Yes)I(Yes) | 5.80%       | 6.563         |                    |         |             |         |
| Medicine                 | P(No)I(Yes)  | 0.00%       |               |                    | <0.0001 | No          | 0.000   |
|                          | P(Yes)I(Yes) | 0.00%       |               |                    | <0.0001 | No          | 0.000   |
| Off-odor                 | P(No)I(Yes)  | 0.00%       |               |                    | <0.0001 | No          | 0.000   |
|                          | P(Yes)I(Yes) | 0.00%       |               |                    | <0.0001 | No          | 0.000   |
| Lemon aroma              | P(No)I(Yes)  | 5.80%       | 4.938         |                    | <0.0001 | No          | 0.000   |
|                          | P(Yes)I(Yes) | 0.00%       |               |                    | <0.0001 | No          | 0.000   |
| Sweet flavor             | P(No)I(Yes)  | 22.10%      | 5.066         | 0.860              | 0.127   | No          | 0.472   |
|                          | P(Yes)I(Yes) | 9.78%       | 5.926         |                    |         |             |         |
| Just-right acidity       | P(No)I(Yes)  | 45.29%      | 4.920         | 1.521              | <0.0001 | Yes         | 1.196   |
|                          | P(Yes)I(Yes) | 21.38%      | 6.441         |                    |         |             |         |
| Just-right sweetness     | P(No)I(Yes)  | 36.96%      | 5.480         | 1.367              | <0.0001 | Yes         | 1.617   |
|                          | P(Yes)I(Yes) | 16.67%      | 6.848         |                    |         |             |         |



|                            |              |        |       |       |         |     |       |
|----------------------------|--------------|--------|-------|-------|---------|-----|-------|
| Metallic                   | P(No)I(Yes)  | 0.00%  |       |       | <0.0001 | No  | 0.000 |
|                            | P(Yes)I(Yes) | 0.00%  |       |       | <0.0001 | No  | 0.000 |
| Fresh                      | P(No)I(Yes)  | 46.38% | 5.063 | 1.795 | <0.0001 | Yes |       |
|                            | P(Yes)I(Yes) | 10.14% | 6.857 |       |         |     | 1.510 |
| Off-flavor                 | P(No)I(Yes)  | 0.00%  |       |       | <0.0001 | No  | 0.000 |
|                            | P(Yes)I(Yes) | 0.00%  |       |       | <0.0001 | No  | 0.000 |
| Ripe fruit flavor          | P(No)I(Yes)  | 27.17% | 5.587 | 1.259 | 0.072   | No  |       |
|                            | P(Yes)I(Yes) | 4.71%  | 6.846 |       |         |     | 1.413 |
| Chemical/artificial flavor | P(No)I(Yes)  | 0.00%  |       |       | <0.0001 | No  | 0.000 |
|                            | P(Yes)I(Yes) | 0.00%  |       |       | <0.0001 | No  | 0.000 |
| Dryness                    | P(No)I(Yes)  | 0.00%  |       |       | <0.0001 | No  | 0.000 |
|                            | P(Yes)I(Yes) | 0.00%  |       |       | <0.0001 | No  | 0.000 |
| Liquorous                  | P(No)I(Yes)  | 0.00%  |       |       | <0.0001 | No  | 0.000 |
|                            | P(Yes)I(Yes) | 0.00%  |       |       | <0.0001 | No  | 0.000 |
| Pineapple flavor           | P(No)I(Yes)  | 22.83% | 5.254 | 1.266 | 0.014   | Yes |       |
|                            | P(Yes)I(Yes) | 9.06%  | 6.520 |       |         |     | 1.122 |

**Table S7.** Penalty analysis for samples with pulp (Ps). Summary of the frequencies with which no presence in the ideal nor in the real product (P(No)I(No)) and no presence in the ideal but yes in the real product (P(Yes)I(No)) occurs for each attribute, mean drops in liking between the two situations and significances.

| Variable                 | Level       | Frequency % | Mean (Liking) | Effects on the mean | P-Value | Significant | Penalty |
|--------------------------|-------------|-------------|---------------|---------------------|---------|-------------|---------|
| Cloudy                   | P(No)I(No)  | 69.57%      | 5.677         |                     |         |             | 0.582   |
|                          | P(Yes)I(No) | 26.09%      | 5.125         | -0.552              | 0.039   | Yes         |         |
| Opaque                   | P(No)I(No)  | 65.58%      | 5.630         |                     |         |             | 0.377   |
|                          | P(Yes)I(No) | 27.17%      | 5.413         | -0.217              | 0.401   | No          |         |
| Yellow color             | P(No)I(No)  | 26.81%      | 5.419         |                     |         |             | -0.111  |
|                          | P(Yes)I(No) | 29.71%      | 4.976         | -0.443              | 0.308   | No          |         |
| Sediments                | P(No)I(No)  | 53.26%      | 5.605         |                     |         |             | 0.226   |
|                          | P(Yes)I(No) | 39.49%      | 5.514         | -0.092              | 0.704   | No          |         |
| Not very aromatic        | P(No)I(No)  | 57.97%      | 5.619         |                     |         |             | 0.283   |
|                          | P(Yes)I(No) | 37.68%      | 5.317         | -0.301              | 0.219   | No          |         |
| Chemical/artificial odor |             | 77.54%      | 6.009         |                     |         |             |         |
|                          | P(No)I(No)  |             |               |                     |         |             |         |
|                          | P(Yes)I(No) | 22.46%      | 3.742         | -2.267              | <0.0001 | Yes         | 0.000   |
